# Supplementary material for: Uncovering Hidden Members and Functions of the Soil Microbiome Using De Novo Metaproteomics
Source: PubMed Central journal article supplement — J Proteome Res. 2022 Jul 6;21(8):2023–35. doi: 10.1021/acs.jproteome.2c00334 (PMC9361346; doi:10.1021/acs.jproteome.2c00334), 2022-07-06
Supplement: pr2c00334_si_001.pdf [file pr2c00334_si_001.pdf]

# Supporting Information for “Uncovering hidden members and functions of the soil microbiome using *de novo* metaproteomics”

*Joon-Yong Lee*<sup>1</sup>, *Hugh D. Mitchell*<sup>1</sup>, *Meagan C. Burnet*<sup>1</sup>, *Ruonan Wu*<sup>1</sup>, *Sarah C. Jenson*<sup>2</sup>, *Eric D. Merkle*<sup>2</sup>, *Ernesto S. Nakayasu*<sup>1</sup>, *Carrie D. Nicora*<sup>1</sup>, *Janet K. Jansson*<sup>1\*</sup>, *Kristin E. Burnum-Johnson*<sup>3\*</sup>, *Samuel H. Payne*<sup>4\*</sup>

<sup>1</sup> Biological Sciences Division, Pacific Northwest National Laboratory, Richland WA

<sup>2</sup> Signature Sciences and Technology Division, Pacific Northwest National Laboratory,

Richland WA

<sup>3</sup> Environmental Molecular Sciences Laboratory, Pacific Northwest National Laboratory,

Richland WA

<sup>4</sup> Biology Department, Brigham Young University, Provo UT

\* Corresponding authors

# Table of Contents

## Supplementary Figures

**Figure S1.** Improvement of deep neural networks with more training data. (Page S-3)

**Figure S2.** Training and validation errors. During the epochs of learning for the deep neural network, progress is measured by evaluating the accuracy of spectrum annotation. (Page S-4)

**Figure S3.** Distribution of peptide lengths used for training and testing the Kaiko model. (Page S-5)

**Figure S4.** Heatmap of the peptide counts for the most common functions over the diverse phyla. Columns and rows in the heatmap represent the phyla and EC numbers, respectively. (Page S-6)

**Figure S5.** Taxa-specific peptides for enzymes in purine metabolism at the phylum level. (Page S-7)

## Supplementary Tables

**Table S1.** LC/MS data files for training and testing the Kaiko model. (Page S-8)

**Table S2.** For each of the six natural isolates, replicate proteomics data was annotated with Kaiko and high-rank taxa were identified. (Page S-20)

**Table S3.** Top 20 of EC numbers most frequently matched from the unique peptides using Unipept 4.6.3 with the identified peptide sequences. (Page S-20)

## Supplementary Figures

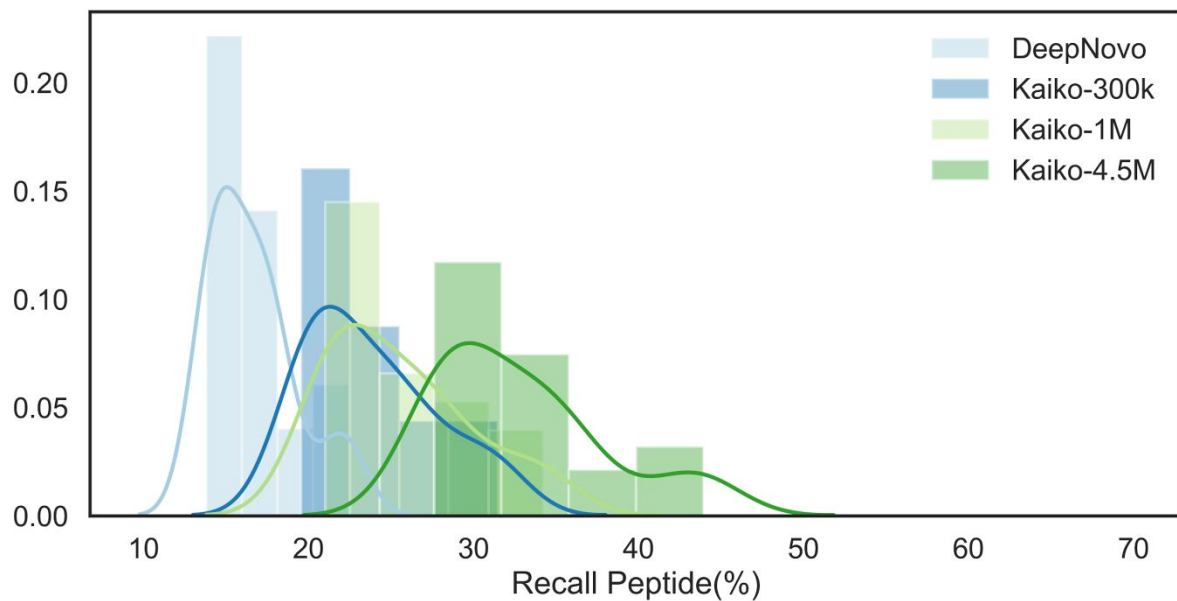

**Figure S1. Improving deep neural networks with more training data.** The accuracy of peptide/spectrum matching is shown for four deep neural network models. DeepNovo is a pre-trained publicly available model trained on 50,000 spectra. Kaiko was trained with varying numbers of spectra. The final model was trained with 4.5 million spectra. A significant improvement is seen in model performance with increased training data.

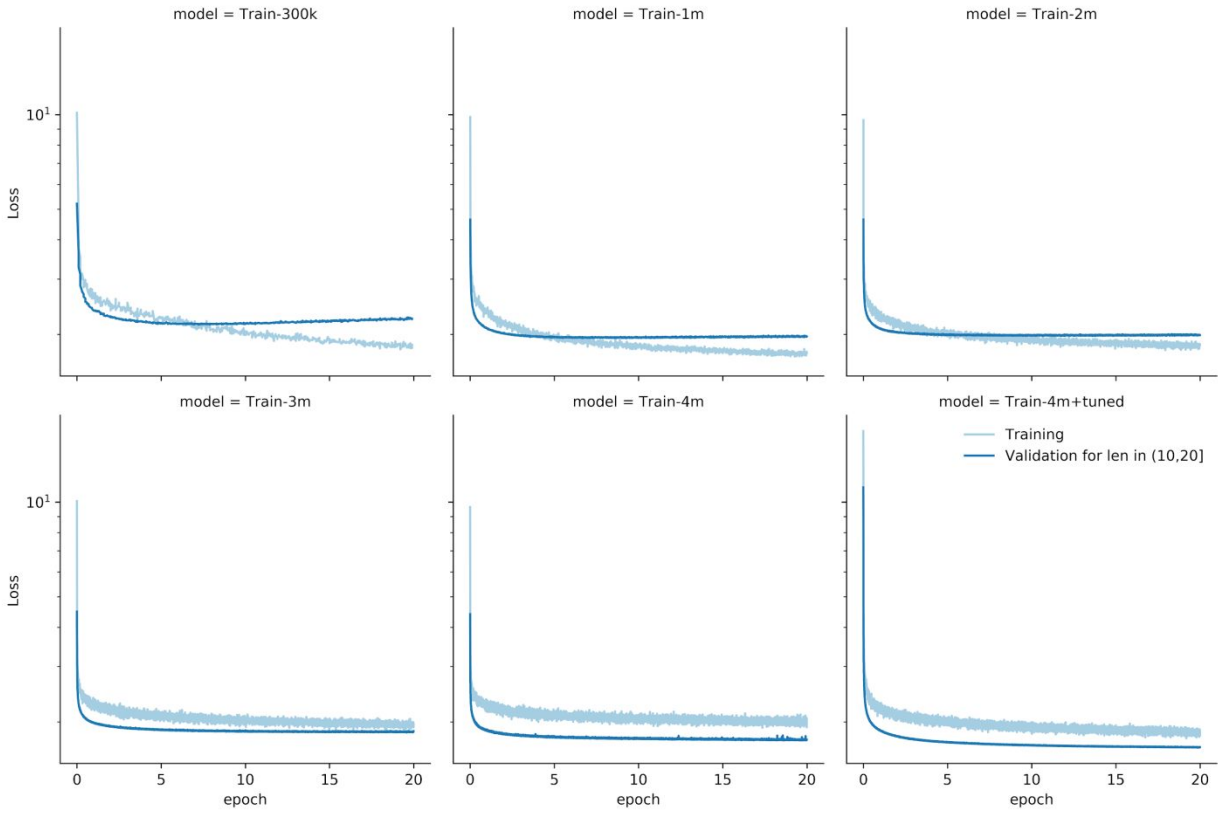

**Figure S2. Training and validation error.** During the epochs of learning for the deep neural network, progress is measured by evaluating the accuracy of spectrum annotation. We employ a cross-entropy loss function, which represents how well the algorithm is being trained, with small numbers being better. The light blue line represents the error on batches of training data. The dark blue lines represent the error on the random samples of the validation data. When the training error improves beyond the validation error, the model is likely to be overfitting.

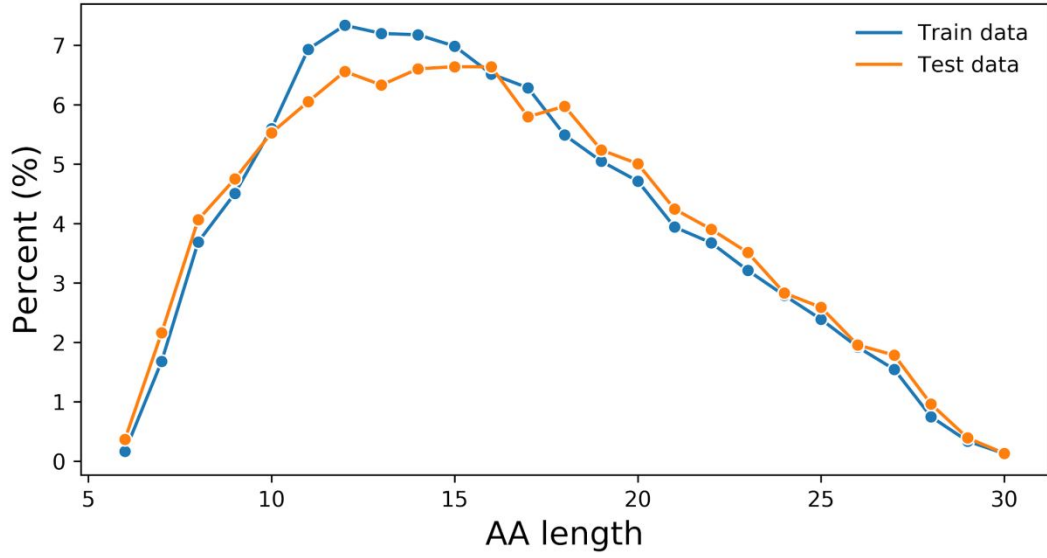

**Figure S3. Distribution of peptide lengths** used for training and testing the Kaiko model.

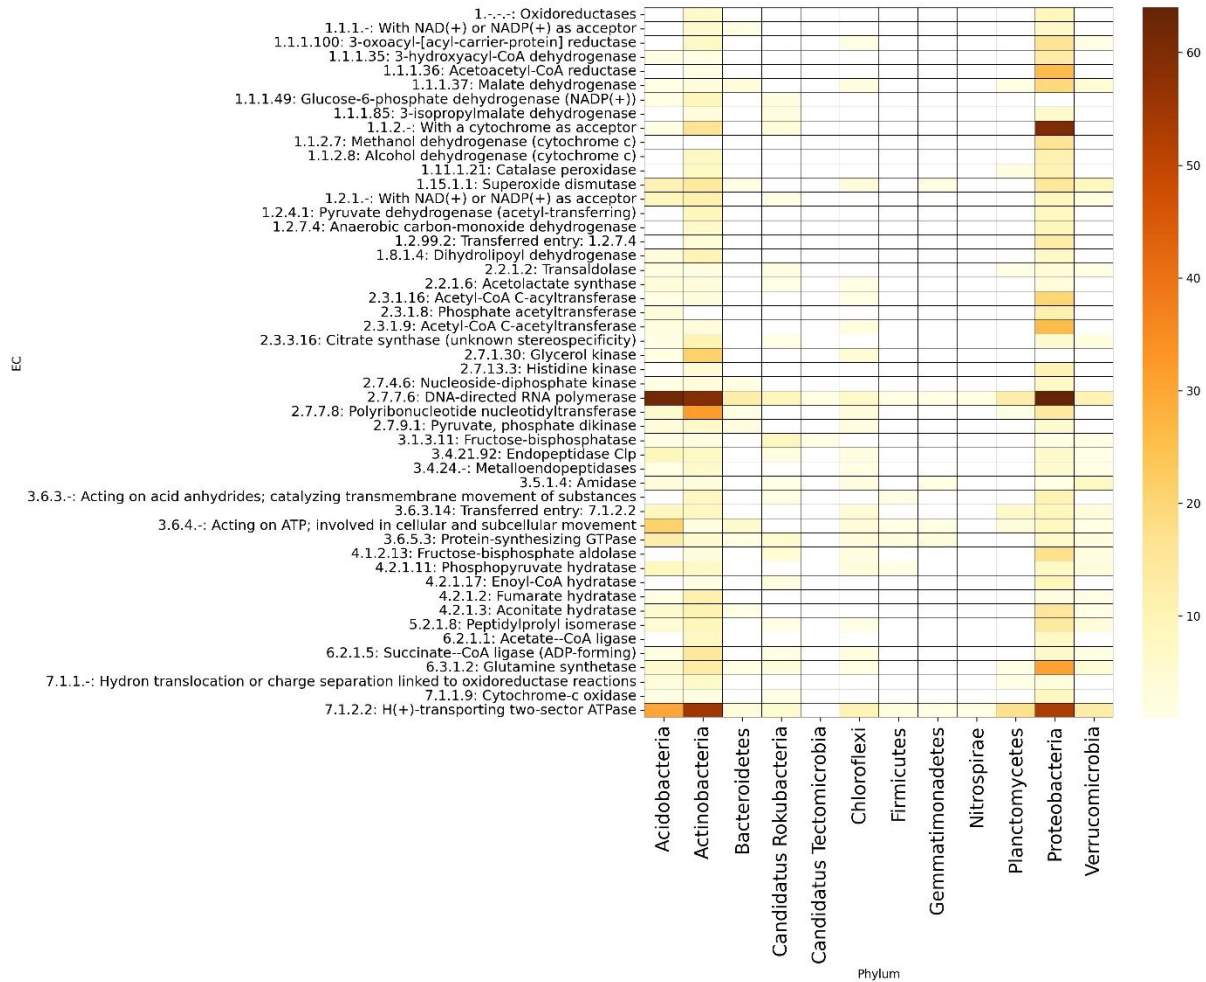

**Figure S4.** Heatmap of the peptide counts for the most common functions over the diverse phyla. Columns and rows in the heatmap represent the phyla and EC numbers, respectively. Cell colors indicate the number of phyla-affiliated peptides corresponding to a specific phylum and function.

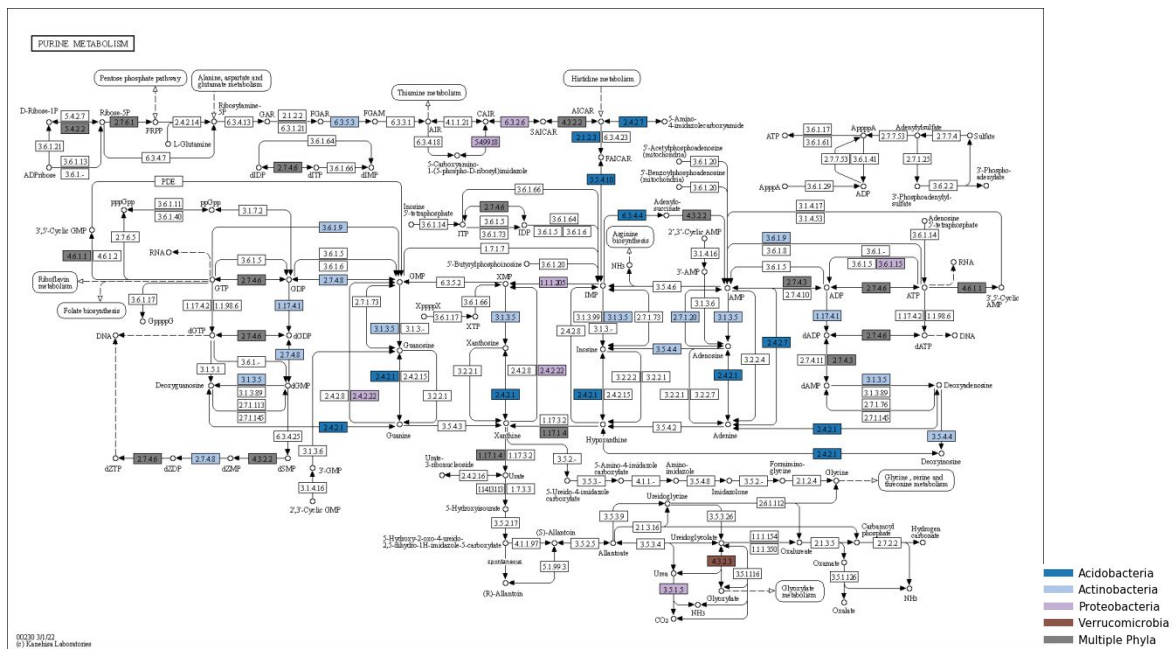

**Figure S5.** Taxa-specific peptides for enzymes in purine metabolism at the phylum level. Many EC numbers were uniquely detected in four phyla (Acidobacteria, Actinobacteria, Proteobacteria, and Verrucomicrobia).



# Supplementary Tables

**Table S1.** LC/MS data files for training and testing the Kaiko model.

| Index | Files                                                                  | Species                             | # PSM | # Cumulative PSM |
|-------|------------------------------------------------------------------------|-------------------------------------|-------|------------------|
| 0     | Biodiversity_A_cryptum_FeTSB_anaerobic_1_01Jun16_Pippin_16-03-39       | Acidiphilium_cryptum_JF-5           | 6659  | 6659             |
| 1     | Biodiversity_A_cryptum_FeTSB_anaerobic_2_01Jun16_Pippin_16-03-39       | Acidiphilium_cryptum_JF-5           | 8532  | 15191            |
| 2     | Biodiversity_A_cryptum_FeTSB_anaerobic_3_01Jun16_Pippin_16-03-39       | Acidiphilium_cryptum_JF-5           | 7379  | 22570            |
| 3     | Biodiversity_A_faecalis_LB_aerobic_01_26Feb16_Arwen_16-01-01           | Alcaligenes_faecalis                | 15496 | 38066            |
| 4     | Biodiversity_A_faecalis_LB_aerobic_02_26Feb16_Arwen_16-01-01           | Alcaligenes_faecalis                | 15367 | 53433            |
| 5     | Biodiversity_A_faecalis_LB_aerobic_03_26Feb16_Arwen_16-01-01           | Alcaligenes_faecalis                | 15035 | 68468            |
| 6     | Biodiversity_A_tumefaciens_R2A_aerobic_1_23Nov16_Pippin_16-09-11       | Agrobacterium_tumefaciens_IAM_12048 | 12994 | 81462            |
| 7     | Biodiversity_A_tumefaciens_R2A_aerobic_2_23Nov16_Pippin_16-09-11       | Agrobacterium_tumefaciens_IAM_12048 | 12442 | 93904            |
| 8     | Biodiversity_A_tumefaciens_R2A_aerobic_3_23Nov16_Pippin_16-09-11       | Agrobacterium_tumefaciens_IAM_12048 | 11916 | 105820           |
| 9     | Biodiversity_B_bifidum_CMcarb_anaerobic_01_26Feb16_Arwen_16-01-01      | Bifidobacterium_bifidum_ATCC29521   | 14409 | 120229           |
| 10    | Biodiversity_B_bifidum_CMcarb_anaerobic_02_26Feb16_Arwen_16-01-01      | Bifidobacterium_bifidum_ATCC29521   | 13731 | 133960           |
| 11    | Biodiversity_B_bifidum_CMcarb_anaerobic_03_26Feb16_Arwen_16-01-01      | Bifidobacterium_bifidum_ATCC29521   | 13854 | 147814           |
| 12    | Biodiversity_B_cereus_ATCC14579_LB_aerobic_1_17July16_Samwise_16-04-10 | Bacillus_cereus_ATCC14579           | 23828 | 171642           |
| 13    | Biodiversity_B_cereus_ATCC14579_LB_aerobic_2_17July16_Samwise_16-04-10 | Bacillus_cereus_ATCC14579           | 23693 | 195335           |
| 14    | Biodiversity_B_cereus_ATCC14579_LB_aerobic_3_17July16_Samwise_16-04-10 | Bacillus_cereus_ATCC14579           | 22460 | 217795           |
| 15    | Biodiversity_B_cereus_PN_L_CL_1_09Oct16_Pippin_16-05-06                | Bacillus_cereus_ATCC14579           | 22349 | 240144           |
| 16    | Biodiversity_B_cereus_PN_L_CL_2_09Oct16_Pippin_16-05-06                | Bacillus_cereus_ATCC14579           | 22572 | 262716           |

|    |                                                                    |                                           |       |        |
|----|--------------------------------------------------------------------|-------------------------------------------|-------|--------|
| 17 | Biodiversity_B_cereus_PN_L_CL_3_09Oct16_Pippin_16-05-06            | Bacillus_cereus_ATCC14579                 | 23153 | 285869 |
| 18 | Biodiversity_B_fragilis_01_28Jul15_Arwen_14-12-03                  | Bacteroides_fragilis_638R                 | 19454 | 305323 |
| 19 | Biodiversity_B_fragilis_Carb_01_28Oct15_Arwen_15-07-13             | Bacteroides_fragilis_638R                 | 17656 | 322979 |
| 20 | Biodiversity_B_fragilis_CMcarb_anaerobic_01_01Feb16_Arwen_15-07-13 | Bacteroides_fragilis_638R                 | 21410 | 344389 |
| 21 | Biodiversity_B_fragilis_CMcarb_anaerobic_02_01Feb16_Arwen_15-07-13 | Bacteroides_fragilis_638R                 | 21703 | 366092 |
| 22 | Biodiversity_B_fragilis_CMcarb_anaerobic_03_01Feb16_Arwen_15-07-13 | Bacteroides_fragilis_638R                 | 22366 | 388458 |
| 23 | Biodiversity_B_fragilis_CMgluc_anaerobic_01_01Feb16_Arwen_15-07-13 | Bacteroides_fragilis_638R                 | 19770 | 408228 |
| 24 | Biodiversity_B_fragilis_CMgluc_anaerobic_02_01Feb16_Arwen_15-07-13 | Bacteroides_fragilis_638R                 | 20803 | 429031 |
| 25 | Biodiversity_B_fragilis_CMgluc_anaerobic_03_01Feb16_Arwen_15-07-13 | Bacteroides_fragilis_638R                 | 20515 | 449546 |
| 26 | Biodiversity_B_fragilis_LB_anaerobic_01_01Feb16_Arwen_15-07-13     | Bacteroides_fragilis_638R                 | 21122 | 470668 |
| 27 | Biodiversity_B_fragilis_LB_anaerobic_02_01Feb16_Arwen_15-07-13     | Bacteroides_fragilis_638R                 | 21756 | 492424 |
| 28 | Biodiversity_B_fragilis_LB_anaerobic_03_01Feb16_Arwen_15-07-13     | Bacteroides_fragilis_638R                 | 22228 | 514652 |
| 29 | Biodiversity_B_fragilis_LIB_aerobic_01_01Feb16_Arwen_15-07-13      | Bacteroides_fragilis_638R                 | 20523 | 535175 |
| 30 | Biodiversity_B_fragilis_LIB_aerobic_02_01Feb16_Arwen_15-07-13      | Bacteroides_fragilis_638R                 | 20037 | 555212 |
| 31 | Biodiversity_B_fragilis_LIB_aerobic_03_01Feb16_Arwen_15-07-13      | Bacteroides_fragilis_638R                 | 21645 | 576857 |
| 32 | Biodiversity_B_fragilis_LIB_anaerobic_01_08Feb16_Arwen_15-07-13    | Bacteroides_fragilis_638R                 | 1055  | 577912 |
| 33 | Biodiversity_B_fragilis_LIB_anaerobic_02_01Feb16_Arwen_15-07-13    | Bacteroides_fragilis_638R                 | 22114 | 600026 |
| 34 | Biodiversity_B_fragilis_LIB_anaerobic_03_01Feb16_Arwen_15-07-13    | Bacteroides_fragilis_638R                 | 21766 | 621792 |
| 35 | Biodiversity_B_infantis_CMcarb_anaerobic_01_26Feb16_Arwen_16-01-01 | Bifidobacterium_longum_infantis_ATCC15697 | 11900 | 633692 |
| 36 | Biodiversity_B_infantis_CMcarb_anaerobic_02_26Feb16_Arwen_16-01-01 | Bifidobacterium_longum_infantis_ATCC15697 | 12737 | 646429 |
| 37 | Biodiversity_B_infantis_CMcarb_anaerobic_03_26Feb16_Arwen_16-01-01 | Bifidobacterium_longum_infantis_ATCC15697 | 11620 | 658049 |

|    |                                                                       |                                      |       |         |
|----|-----------------------------------------------------------------------|--------------------------------------|-------|---------|
| 38 | Biodiversity_B_subtilis_NCIB3610_24h_plates_1_13Jun16_Pippin_16-03-39 | Bacillus_subtilis_NCIB3610           | 14159 | 672208  |
| 39 | Biodiversity_B_subtilis_NCIB3610_24h_plates_2_13Jun16_Pippin_16-03-39 | Bacillus_subtilis_NCIB3610           | 12880 | 685088  |
| 40 | Biodiversity_B_subtilis_NCIB3610_24h_plates_3_13Jun16_Pippin_16-03-39 | Bacillus_subtilis_NCIB3610           | 12518 | 697606  |
| 41 | Biodiversity_B_subtilis_NCIB3610_48h_plates_1_13Jun16_Pippin_16-03-39 | Bacillus_subtilis_NCIB3610           | 9087  | 706693  |
| 42 | Biodiversity_B_subtilis_NCIB3610_48h_plates_2_13Jun16_Pippin_16-03-39 | Bacillus_subtilis_NCIB3610           | 8258  | 714951  |
| 43 | Biodiversity_B_subtilis_NCIB3610_48h_plates_3_13Jun16_Pippin_16-03-39 | Bacillus_subtilis_NCIB3610           | 5163  | 720114  |
| 44 | Biodiversity_B_subtilis_NCIB3610_pellet_1_03May16_Samwise_16-03-32    | Bacillus_subtilis_NCIB3610           | 20922 | 741036  |
| 45 | Biodiversity_B_subtilis_NCIB3610_pellet_2_03May16_Samwise_16-03-32    | Bacillus_subtilis_NCIB3610           | 21034 | 762070  |
| 46 | Biodiversity_B_subtilis_NCIB3610_plates_1_03May16_Samwise_16-03-32    | Bacillus_subtilis_NCIB3610           | 12240 | 774310  |
| 47 | Biodiversity_B_subtilis_NCIB3610_plates_2_03May16_Samwise_16-03-32    | Bacillus_subtilis_NCIB3610           | 13306 | 787616  |
| 48 | Biodiversity_B_subtilis_pellet_set2_1_13Jun16_Pippin_16-03-39         | Bacillus_subtilis_NCIB3610           | 17709 | 805325  |
| 49 | Biodiversity_B_subtilis_pellet_set2_2_13Jun16_Pippin_16-03-39         | Bacillus_subtilis_NCIB3610           | 17532 | 822857  |
| 50 | Biodiversity_B_subtilis_pellet_set2_3_13Jun16_Pippin_16-03-39         | Bacillus_subtilis_NCIB3610           | 18214 | 841071  |
| 51 | Biodiversity_B_thet_CMcarb_anaerobic_01_01Feb16_Arwen_15-07-13        | Bacteroides_thetaiotaomicon_VPI-5482 | 22586 | 863657  |
| 52 | Biodiversity_B_thet_CMcarb_anaerobic_02_01Feb16_Arwen_15-07-13        | Bacteroides_thetaiotaomicon_VPI-5482 | 25220 | 888877  |
| 53 | Biodiversity_B_thet_CMcarb_anaerobic_03_01Feb16_Arwen_15-07-13        | Bacteroides_thetaiotaomicon_VPI-5482 | 22535 | 911412  |
| 54 | Biodiversity_B_thet_CMgluc_anaerobic_01_01Feb16_Arwen_15-07-13        | Bacteroides_thetaiotaomicon_VPI-5482 | 20596 | 932008  |
| 55 | Biodiversity_B_thet_CMgluc_anaerobic_02_01Feb16_Arwen_15-07-13        | Bacteroides_thetaiotaomicon_VPI-5482 | 20725 | 952733  |
| 56 | Biodiversity_B_thet_CMgluc_anaerobic_03_01Feb16_Arwen_15-07-13        | Bacteroides_thetaiotaomicon_VPI-5482 | 20639 | 973372  |
| 57 | Biodiversity_B_thet_LB_anaerobic_01_01Feb16_Arwen_15-07-13            | Bacteroides_thetaiotaomicon_VPI-5482 | 22310 | 995682  |
| 58 | Biodiversity_B_thet_LB_anaerobic_02_01Feb16_Arwen_15-07-13            | Bacteroides_thetaiotaomicon_VPI-5482 | 20736 | 1016418 |

|    |                                                               |                                      |       |         |
|----|---------------------------------------------------------------|--------------------------------------|-------|---------|
| 59 | Biodiversity_B_thet_LB_anaerobic_03_01Feb16_Arwen_15-07-13    | Bacteroides_thetaiotaomicon_VPI-5482 | 17178 | 1033596 |
| 60 | Biodiversity_B_thet_LIB_anaerobic_01_01Feb16_Arwen_15-07-13   | Bacteroides_thetaiotaomicon_VPI-5482 | 23175 | 1056771 |
| 61 | Biodiversity_B_thet_LIB_anaerobic_02_01Feb16_Arwen_15-07-13   | Bacteroides_thetaiotaomicon_VPI-5482 | 21920 | 1078691 |
| 62 | Biodiversity_B_thet_LIB_anaerobic_03_01Feb16_Arwen_15-07-13   | Bacteroides_thetaiotaomicon_VPI-5482 | 22215 | 1100906 |
| 63 | Biodiversity_B_thetaiotaomicon_Carb_01_26Aug15_Arwen_15-07-13 | Bacteroides_thetaiotaomicon_VPI-5482 | 22781 | 1123687 |
| 64 | Biodiversity_B_thetaiotaomicon_Glc_01_26Aug15_Arwen_15-07-13  | Bacteroides_thetaiotaomicon_VPI-5482 | 25625 | 1149312 |
| 65 | Biodiversity_Bacillus_subtilis_LB_01_27Dec15_Arwen_15-07-13   | Bacillus_subtilis_168                | 23891 | 1173203 |
| 66 | Biodiversity_Bacillus_subtilis_LB_02_27Dec15_Arwen_15-07-13   | Bacillus_subtilis_168                | 23513 | 1196716 |
| 67 | Biodiversity_Bacillus_subtilis_LB_03_27Dec15_Arwen_15-07-13   | Bacillus_subtilis_168                | 25596 | 1222312 |
| 68 | Biodiversity_C_Baltica_T240_R1_C_27Jan16_Arwen_15-07-13       | Cellulophaga_baltica_18              | 23983 | 1246295 |
| 69 | Biodiversity_C_Baltica_T240_R1_Inf_27Jan16_Arwen_15-07-13     | Cellulophaga_baltica_18              | 26844 | 1273139 |
| 70 | Biodiversity_C_Baltica_T240_R2_C_27Jan16_Arwen_15-07-13       | Cellulophaga_baltica_18              | 26240 | 1299379 |
| 71 | Biodiversity_C_Baltica_T240_R2_Inf_27Jan16_Arwen_15-07-13     | Cellulophaga_baltica_18              | 26536 | 1325915 |
| 72 | Biodiversity_C_Baltica_T240_R3_C_27Jan16_Arwen_15-07-13       | Cellulophaga_baltica_18              | 27084 | 1352999 |
| 73 | Biodiversity_C_Baltica_T240_R3_Inf_27Jan16_Arwen_15-07-13     | Cellulophaga_baltica_18              | 27658 | 1380657 |
| 74 | Biodiversity_C_comes_Carb_01_14Sep15_Arwen_15-07-13           | Coprococcus_comes_ATCC27758          | 20528 | 1401185 |
| 75 | Biodiversity_C_comes_Glc_01_28Oct15_Arwen_15-07-13            | Coprococcus_comes_ATCC27758          | 21095 | 1422280 |
| 76 | Biodiversity_C_comes_LIB_01_28Oct15_Arwen_15-07-13            | Coprococcus_comes_ATCC27758          | 21532 | 1443812 |
| 77 | Biodiversity_C_freundii_LB_01_14Sep15_Arwen_15-07-13          | Citrobacter_freundii                 | 23455 | 1467267 |
| 78 | Biodiversity_C_freundii_LIB_01_28Oct15_Arwen_15-07-13         | Citrobacter_freundii                 | 22562 | 1489829 |
| 79 | Biodiversity_C_gilvus_GS2_anaerobic_01_01Feb16_Arwen_15-07-13 | Cellulomonas_gilvus_ATCC13127        | 25544 | 1515373 |

|     |                                                                            |                                   |       |         |
|-----|----------------------------------------------------------------------------|-----------------------------------|-------|---------|
| 80  | Biodiversity_C_gilvus_GS2_anaerobic_02_01Feb16_Arwen_15-07-13              | Cellulomonas_gilvus_ATCC13127     | 24443 | 1539816 |
| 81  | Biodiversity_C_gilvus_GS2_anaerobic_03_01Feb16_Arwen_15-07-13              | Cellulomonas_gilvus_ATCC13127     | 24651 | 1564467 |
| 82  | Biodiversity_C_indologenes_LIB_aerobic_01_03May16_Samwise_16-03-32         | Chryseobacterium_indologenes      | 12314 | 1576781 |
| 83  | Biodiversity_C_indologenes_LIB_aerobic_02_03May16_Samwise_16-03-32         | Chryseobacterium_indologenes      | 12289 | 1589070 |
| 84  | Biodiversity_C_indologenes_LIB_aerobic_03_03May16_Samwise_16-03-32         | Chryseobacterium_indologenes      | 12315 | 1601385 |
| 85  | Biodiversity_C_ljungdahlii_CO_anaerobic_1_04Oct16_Pippin_16-05-06          | Clostridium_ljungdahlii_DMS_13528 | 20363 | 1621748 |
| 86  | Biodiversity_C_ljungdahlii_CO_anaerobic_2_04Oct16_Pippin_16-05-06          | Clostridium_ljungdahlii_DMS_13528 | 21268 | 1643016 |
| 87  | Biodiversity_C_ljungdahlii_CO_anaerobic_3_04Oct16_Pippin_16-05-06          | Clostridium_ljungdahlii_DMS_13528 | 20785 | 1663801 |
| 88  | Biodiversity_C_ljungdahlii_Fructose_anaerobic_1_04Oct16_Pippin_16-05-06    | Clostridium_ljungdahlii_DMS_13528 | 21315 | 1685116 |
| 89  | Biodiversity_C_ljungdahlii_Fructose_anaerobic_2_04Oct16_Pippin_16-05-06    | Clostridium_ljungdahlii_DMS_13528 | 21903 | 1707019 |
| 90  | Biodiversity_C_ljungdahlii_Fructose_anaerobic_3_04Oct16_Pippin_16-05-06    | Clostridium_ljungdahlii_DMS_13528 | 22204 | 1729223 |
| 91  | Biodiversity_C_necator_R2A_aerobic_1_23Nov16_Pippin_16-09-11               | Cupriavidus_necator_N-1           | 17734 | 1746957 |
| 92  | Biodiversity_C_necator_R2A_aerobic_2_23Nov16_Pippin_16-09-11               | Cupriavidus_necator_N-1           | 16630 | 1763587 |
| 93  | Biodiversity_C_necator_R2A_aerobic_3_23Nov16_Pippin_16-09-11               | Cupriavidus_necator_N-1           | 16005 | 1779592 |
| 94  | Biodiversity_Cellulomonas_gilvus_GS2_01_27Dec15_Arwen_15-07-13             | Cellulomonas_gilvus_ATCC13127     | 24408 | 1804000 |
| 95  | Biodiversity_Cellulomonas_gilvus_GS2_02_27Dec15_Arwen_15-07-13             | Cellulomonas_gilvus_ATCC13127     | 24056 | 1828056 |
| 96  | Biodiversity_Cellulomonas_gilvus_GS2_03_27Dec15_Arwen_15-07-13             | Cellulomonas_gilvus_ATCC13127     | 23653 | 1851709 |
| 97  | Biodiversity_Citrobacter_freundii_LB_aerobic_01_01Feb16_Arwen_15-07-13     | Citrobacter_freundii              | 23581 | 1875290 |
| 98  | Biodiversity_Citrobacter_freundii_LB_aerobic_02_01Feb16_Arwen_15-07-13     | Citrobacter_freundii              | 22579 | 1897869 |
| 99  | Biodiversity_Citrobacter_freundii_LB_aerobic_03_01Feb16_Arwen_15-07-13     | Citrobacter_freundii              | 23273 | 1921142 |
| 100 | Biodiversity_D_acidovorans_TGY_aerobic_01_29Apr16_Samwise_16-03-32_renamed | Delftia_acidovorans_SPH1          | 21871 | 1943013 |

|     |                                                                            |                              |       |         |
|-----|----------------------------------------------------------------------------|------------------------------|-------|---------|
| 101 | Biodiversity_D_acidovorans_TGY_aerobic_02_29Apr16_Samwise_16-03-32_renamed | Delftia_acidovorans_SPH1     | 20549 | 1963562 |
| 102 | Biodiversity_D_acidovorans_TGY_aerobic_03_29Apr16_Samwise_16-03-32_renamed | Delftia_acidovorans_SPH1     | 19125 | 1982687 |
| 103 | Biodiversity_D_longicatena_CarBI_01_26Aug15_Arwen_15-07-13                 | Dorea_longicatena_DSM13814   | 23197 | 2005884 |
| 104 | Biodiversity_D_longicatena_CarBII_01_26Aug15_Arwen_15-07-13                | Dorea_longicatena_DSM13814   | 22441 | 2028325 |
| 105 | Biodiversity_D_longicatena_Glc_01_28Oct15_Arwen_15-07-13                   | Dorea_longicatena_DSM13814   | 19551 | 2047876 |
| 106 | Biodiversity_F_novicida_TSB_aerobic_01_01Feb16_Arwen_15-07-13              | Francisella_novicida_U112    | 25900 | 2073776 |
| 107 | Biodiversity_F_novicida_TSB_aerobic_02_01Feb16_Arwen_15-07-13              | Francisella_novicida_U112    | 23556 | 2097332 |
| 108 | Biodiversity_F_novicida_TSB_aerobic_03_01Feb16_Arwen_15-07-13              | Francisella_novicida_U112    | 23189 | 2120521 |
| 109 | Biodiversity_F_prausnitzii_Carb_01_28Oct15_Arwen_15-07-13                  | Faecalibacterium_prausnitzii | 11204 | 2131725 |
| 110 | Biodiversity_F_prausnitzii_Glc_01_28Oct15_Arwen_15-07-13                   | Faecalibacterium_prausnitzii | 13901 | 2145626 |
| 111 | Biodiversity_F_prausnitzii_LIB_01_28Oct15_Arwen_15-07-13                   | Faecalibacterium_prausnitzii | 12858 | 2158484 |
| 112 | Biodiversity_F_succinogenes_MDM_01_27Dec15_Arwen_15-07-13                  | Fibrobacter_succinogenes_S85 | 20923 | 2179407 |
| 113 | Biodiversity_F_succinogenes_MDM_02_27Dec15_Arwen_15-07-13                  | Fibrobacter_succinogenes_S85 | 23278 | 2202685 |
| 114 | Biodiversity_F_succinogenes_MDM_03_27Dec15_Arwen_15-07-13                  | Fibrobacter_succinogenes_S85 | 21665 | 2224350 |
| 115 | Biodiversity_HL111_HLHglutamate_aerobic_1_14July16_Pippin_16-05-01         | Erythrobacter_HL-111         | 16707 | 2241057 |
| 116 | Biodiversity_HL111_HLHglutamate_aerobic_2_14July16_Pippin_16-05-01         | Erythrobacter_HL-111         | 15709 | 2256766 |
| 117 | Biodiversity_HL111_HLHglutamate_aerobic_3_14July16_Pippin_16-05-01         | Erythrobacter_HL-111         | 17636 | 2274402 |
| 118 | Biodiversity_HL48_HLHxylose_aerobic_1_09Jun16_Pippin_16-03-39              | Halomonas_HL-48              | 19564 | 2293966 |
| 119 | Biodiversity_HL48_HLHxylose_aerobic_2_09Jun16_Pippin_16-03-39              | Halomonas_HL-48              | 11419 | 2305385 |
| 120 | Biodiversity_HL48_HLHxylose_aerobic_3_09Jun16_Pippin_16-03-39              | Halomonas_HL-48              | 19558 | 2324943 |
| 121 | Biodiversity_HL49_HLHye_aerobic_1_05Oct16_Pippin_16-05-06                  | Algoriphagus_marincola_HL-49 | 20745 | 2345688 |

|     |                                                                     |                                  |       |         |
|-----|---------------------------------------------------------------------|----------------------------------|-------|---------|
| 122 | Biodiversity_HL49_HLHYE_aerobic_2_05Oct16_Pippin_16-05-06           | Algoriphagus_marincola_HL-49     | 25153 | 2370841 |
| 123 | Biodiversity_HL49_HLHYE_aerobic_3_05Oct16_Pippin_16-05-06           | Algoriphagus_marincola_HL-49     | 24520 | 2395361 |
| 124 | Biodiversity_HL69_HLA_aerobic_1_05Oct16_Pippin_16-05-06             | Cyanobacterium_stanieri          | 15059 | 2410420 |
| 125 | Biodiversity_HL69_HLA_aerobic_2_05Oct16_Pippin_16-05-06             | Cyanobacterium_stanieri          | 14529 | 2424949 |
| 126 | Biodiversity_HL69_HLA_aerobic_3_05Oct16_Pippin_16-05-06             | Cyanobacterium_stanieri          | 16531 | 2441480 |
| 127 | Biodiversity_HL91_HLHsucrose_aerobic_1_09Jun16_Pippin_16-03-39      | Rhodobacteraceae_bacterium_HL-91 | 18271 | 2459751 |
| 128 | Biodiversity_HL91_HLHsucrose_aerobic_2_09Jun16_Pippin_16-03-39      | Rhodobacteraceae_bacterium_HL-91 | 18280 | 2478031 |
| 129 | Biodiversity_HL91_HLHsucrose_aerobic_3_09Jun16_Pippin_16-03-39      | Rhodobacteraceae_bacterium_HL-91 | 19857 | 2497888 |
| 130 | Biodiversity_HL93_HLHfructose_aerobic_1_09Jun16_Pippin_16-03-39     | Halomonas_HL-93                  | 9976  | 2507864 |
| 131 | Biodiversity_HL93_HLHfructose_aerobic_2_09Jun16_Pippin_16-03-39     | Halomonas_HL-93                  | 9277  | 2517141 |
| 132 | Biodiversity_HL93_HLHfructose_aerobic_3_09Jun16_Pippin_16-03-39     | Halomonas_HL-93                  | 8961  | 2526102 |
| 133 | Biodiversity_L_monocytogenes_BHI_aerobic_01_27Feb17_Pippin_16-11-03 | Listeria_monocytogenes_10403S    | 27172 | 2553274 |
| 134 | Biodiversity_L_monocytogenes_BHI_aerobic_02_27Feb17_Pippin_16-11-03 | Listeria_monocytogenes_10403S    | 25972 | 2579246 |
| 135 | Biodiversity_L_monocytogenes_BHI_aerobic_03_27Feb17_Pippin_16-11-03 | Listeria_monocytogenes_10403S    | 26591 | 2605837 |
| 136 | Biodiversity_Lactobacillus_casei_MRS_01_27Dec15_Arwen_15-07-13      | Lactobacillales_casei            | 11555 | 2617392 |
| 137 | Biodiversity_Lactobacillus_casei_MRS_02_27Dec15_Arwen_15-07-13      | Lactobacillales_casei            | 10984 | 2628376 |
| 138 | Biodiversity_Lactobacillus_casei_MRS_03_27Dec15_Arwen_15-07-13      | Lactobacillales_casei            | 12133 | 2640509 |
| 139 | Biodiversity_M_luteus_LIB_aerobic_01_26Feb16_Arwen_16-01-01         | Micrococcus_luteus               | 14623 | 2655132 |
| 140 | Biodiversity_M_luteus_LIB_aerobic_02_26Feb16_Arwen_16-01-01         | Micrococcus_luteus               | 14694 | 2669826 |
| 141 | Biodiversity_M_luteus_LIB_aerobic_03_26Feb16_Arwen_16-01-01         | Micrococcus_luteus               | 14865 | 2684691 |
| 142 | Biodiversity_M_smegmatis_BHI_aerobic_1_05Oct16_Pippin_16-05-06      | Mycobacterium_smegmatis          | 22302 | 2706993 |

|     |                                                                              |                                    |       |         |
|-----|------------------------------------------------------------------------------|------------------------------------|-------|---------|
| 143 | Biodiversity_M_smeigmatis_BHI_aerobic_2_05Oct16_Pippin_16-05-06              | Mycobacterium_smeigmatis           | 23937 | 2730930 |
| 144 | Biodiversity_M_smeigmatis_BHI_aerobic_3_05Oct16_Pippin_16-05-06              | Mycobacterium_smeigmatis           | 23123 | 2754053 |
| 145 | Biodiversity_M_xanthus_DZ2_24h_plates_1_13Jun16_Pippin_16-03-39              | Myxococcus_xanthus_DZ2             | 17676 | 2771729 |
| 146 | Biodiversity_M_xanthus_DZ2_24h_plates_2_13Jun16_Pippin_16-03-39              | Myxococcus_xanthus_DZ2             | 18291 | 2790020 |
| 147 | Biodiversity_M_xanthus_DZ2_24h_plates_3_13Jun16_Pippin_16-03-39              | Myxococcus_xanthus_DZ2             | 17586 | 2807606 |
| 148 | Biodiversity_M_xanthus_DZ2_48h_plates_1_13Jun16_Pippin_16-03-39              | Myxococcus_xanthus_DZ2             | 20435 | 2828041 |
| 149 | Biodiversity_M_xanthus_DZ2_48h_plates_2_13Jun16_Pippin_16-03-39              | Myxococcus_xanthus_DZ2             | 18715 | 2846756 |
| 150 | Biodiversity_M_xanthus_DZ2_48h_plates_3_13Jun16_Pippin_16-03-39              | Myxococcus_xanthus_DZ2             | 19998 | 2866754 |
| 151 | Biodiversity_M_xanthus_DZ2_pellet_1_03May16_Samwise_16-03-32                 | Myxococcus_xanthus_DZ2             | 24459 | 2891213 |
| 152 | Biodiversity_M_xanthus_DZ2_pellet_2_03May16_Samwise_16-03-32                 | Myxococcus_xanthus_DZ2             | 24181 | 2915394 |
| 153 | Biodiversity_M_xanthus_DZ2_plates_1_03May16_Samwise_16-03-32                 | Myxococcus_xanthus_DZ2             | 18520 | 2933914 |
| 154 | Biodiversity_M_xanthus_DZ2_plates_2_03May16_Samwise_16-03-32                 | Myxococcus_xanthus_DZ2             | 17909 | 2951823 |
| 155 | Biodiversity_M_xanthus_pellet_set2_1_13Jun16_Pippin_16-03-39                 | Myxococcus_xanthus_DZ2             | 23354 | 2975177 |
| 156 | Biodiversity_M_xanthus_pellet_set2_2_13Jun16_Pippin_16-03-39                 | Myxococcus_xanthus_DZ2             | 23884 | 2999061 |
| 157 | Biodiversity_M_xanthus_pellet_set2_3_13Jun16_Pippin_16-03-39                 | Myxococcus_xanthus_DZ2             | 22772 | 3021833 |
| 158 | Biodiversity_P_denitrificans_LIB_aerobic_01_29Apr16_Samwise_16-03-32_renamed | Paracoccus_denitrificans           | 22165 | 3043998 |
| 159 | Biodiversity_P_denitrificans_LIB_aerobic_02_29Apr16_Samwise_16-03-32_renamed | Paracoccus_denitrificans           | 20888 | 3064886 |
| 160 | Biodiversity_P_denitrificans_LIB_aerobic_03_29Apr16_Samwise_16-03-32_renamed | Paracoccus_denitrificans           | 23115 | 3088001 |
| 161 | Biodiversity_P_hydrogenalis_01_28Jul15_Arwen_14-12-03                        | Anaerococcus_hydrogenalis_DSM_7454 | 18519 | 3106520 |
| 162 | Biodiversity_P_hydrogenalis_CMgluc_anaerobic_01_26Feb16_Arwen_16-01-01       | Anaerococcus_hydrogenalis_DSM_7454 | 12813 | 3119333 |
| 163 | Biodiversity_P_hydrogenalis_CMgluc_anaerobic_02_26Feb16_Arwen_16-01-01       | Anaerococcus_hydrogenalis_DSM_7454 | 13371 | 3132704 |



|     |                                                                         |                                      |       |         |
|-----|-------------------------------------------------------------------------|--------------------------------------|-------|---------|
| 164 | Biodiversity_P_hydrogenalis_CMgluc_anaerobic_03_26Feb16_Arwen_16-01-01  | Anaerococcus_hydrogenalis_DSM_7454   | 12649 | 3145353 |
| 165 | Biodiversity_P_polymyxa_TBS_aerobic_1_17July16_Samwise_16-04-10         | Paenibacillus_polymyxa_ATC_C842      | 25623 | 3170976 |
| 166 | Biodiversity_P_polymyxa_TBS_aerobic_2_17July16_Samwise_16-04-10         | Paenibacillus_polymyxa_ATC_C842      | 25057 | 3196033 |
| 167 | Biodiversity_P_polymyxa_TBS_aerobic_3_17July16_Samwise_16-04-10         | Paenibacillus_polymyxa_ATC_C842      | 24268 | 3220301 |
| 168 | Biodiversity_P_ruminicola_MDM_anaerobic_1_09Jun16_Pippin_16-03-39       | Prevotella_ruminicola_23_ATC_C_19189 | 17277 | 3237578 |
| 169 | Biodiversity_P_ruminicola_MDM_anaerobic_2_09Jun16_Pippin_16-03-39       | Prevotella_ruminicola_23_ATC_C_19189 | 17543 | 3255121 |
| 170 | Biodiversity_R_gnavus_01_28Jul15_Arwen_14-12-03                         | Ruminococcus_gnavus                  | 20132 | 3275253 |
| 171 | Biodiversity_R_gnavus_Carb_01_28Oct15_Arwen_15-07-13                    | Ruminococcus_gnavus                  | 22004 | 3297257 |
| 172 | Biodiversity_R_jostii_R2A_aerobic_1_23Nov16_Pippin_16-09-11             | Rhodococcus_jostii_RHA1              | 24374 | 3321631 |
| 173 | Biodiversity_R_jostii_R2A_aerobic_2_23Nov16_Pippin_16-09-11             | Rhodococcus_jostii_RHA1              | 23736 | 3345367 |
| 174 | Biodiversity_R_jostii_R2A_aerobic_3_23Nov16_Pippin_16-09-11             | Rhodococcus_jostii_RHA1              | 22296 | 3367663 |
| 175 | Biodiversity_R_palustris_PM_aerobic_1_01Jun16_Pippin_16-03-39           | Rhodopseudomonas_palustris           | 21988 | 3389651 |
| 176 | Biodiversity_R_palustris_PM_aerobic_2_01Jun16_Pippin_16-03-39           | Rhodopseudomonas_palustris           | 21998 | 3411649 |
| 177 | Biodiversity_R_palustris_PM_aerobic_3_01Jun16_Pippin_16-03-39           | Rhodopseudomonas_palustris           | 20740 | 3432389 |
| 178 | Biodiversity_R_palustris_PMnitro_anaerobic_1_01Jun16_Pippin_16-03-39    | Rhodopseudomonas_palustris           | 20820 | 3453209 |
| 179 | Biodiversity_R_palustris_PMnitro_anaerobic_2_01Jun16_Pippin_16-03-39    | Rhodopseudomonas_palustris           | 20800 | 3474009 |
| 180 | Biodiversity_R_palustris_PMnitro_anaerobic_3_01Jun16_Pippin_16-03-39    | Rhodopseudomonas_palustris           | 19401 | 3493410 |
| 181 | Biodiversity_R_palustris_PMnonnitro_anaerobic_1_01Jun16_Pippin_16-03-39 | Rhodopseudomonas_palustris           | 21220 | 3514630 |
| 182 | Biodiversity_R_palustris_PMnonnitro_anaerobic_2_01Jun16_Pippin_16-03-39 | Rhodopseudomonas_palustris           | 21947 | 3536577 |
| 183 | Biodiversity_R_palustris_PMnonnitro_anaerobic_3_01Jun16_Pippin_16-03-39 | Rhodopseudomonas_palustris           | 20793 | 3557370 |
| 184 | Biodiversity_S_agalactiae_LIB_aerobic_01_26Feb16_Arwen_16-01-01         | Streptococcus_agalactiae             | 12558 | 3569928 |

|     |                                                                     |                                    |       |         |
|-----|---------------------------------------------------------------------|------------------------------------|-------|---------|
| 185 | Biodiversity_S_agalactiae_LIB_aerobic_02_26Feb16_Arwen_16-01-01     | Streptococcus_agalactiae           | 11366 | 3581294 |
| 186 | Biodiversity_S_agalactiae_LIB_aerobic_03_26Feb16_Arwen_16-01-01     | Streptococcus_agalactiae           | 11845 | 3593139 |
| 187 | Biodiversity_S_aurantiaca_CYE_aerobic_1_17July16_Samwise_16-04-10   | Stigmatella_aurantiaca_DW431       | 26687 | 3619826 |
| 188 | Biodiversity_S_aurantiaca_CYE_aerobic_2_17July16_Samwise_16-04-10   | Stigmatella_aurantiaca_DW431       | 25198 | 3645024 |
| 189 | Biodiversity_S_aurantiaca_CYE_aerobic_3_17July16_Samwise_16-04-10   | Stigmatella_aurantiaca_DW431       | 28243 | 3673267 |
| 190 | Biodiversity_S_elongatus_BG11_aerobic_1_14July16_Pippin_16-05-01    | Synechococcus_elongatus_PCC7942    | 16601 | 3689868 |
| 191 | Biodiversity_S_elongatus_BG11_aerobic_2_14July16_Pippin_16-05-01    | Synechococcus_elongatus_PCC7942    | 16512 | 3706380 |
| 192 | Biodiversity_S_elongatus_BG11_aerobic_3_14July16_Pippin_16-05-01    | Synechococcus_elongatus_PCC7942    | 16383 | 3722763 |
| 193 | Biodiversity_S_elongatus_BG11NaCl_aerobic_1_05Oct16_Pippin_16-05-06 | Synechococcus_elongatus_PCC7942    | 18618 | 3741381 |
| 194 | Biodiversity_S_elongatus_BG11NaCl_aerobic_2_05Oct16_Pippin_16-05-06 | Synechococcus_elongatus_PCC7942    | 19025 | 3760406 |
| 195 | Biodiversity_S_elongatus_BG11NaCl_aerobic_3_05Oct16_Pippin_16-05-06 | Synechococcus_elongatus_PCC7942    | 18419 | 3778825 |
| 196 | Biodiversity_S_griseorubens_HSM_aerobic_1_23Nov16_Pippin_16-09-11   | Streptomyces_griseorubens          | 7798  | 3786623 |
| 197 | Biodiversity_S_griseorubens_HSM_aerobic_2_23Nov16_Pippin_16-09-11   | Streptomyces_griseorubens          | 7869  | 3794492 |
| 198 | Biodiversity_S_griseorubens_HSM_aerobic_3_23Nov16_Pippin_16-09-11   | Streptomyces_griseorubens          | 5960  | 3800452 |
| 199 | Biodiversity_S_thermosulf_FeYE_anaerobic_1_01Jun16_Pippin_16-03-39  | Sulfobacillus_thermosulfidooxidans | 14607 | 3815059 |
| 200 | Biodiversity_S_thermosulf_FeYE_anaerobic_2_01Jun16_Pippin_16-03-39  | Sulfobacillus_thermosulfidooxidans | 14762 | 3829821 |
| 201 | Biodiversity_S_thermosulf_FeYE_anaerobic_3_01Jun16_Pippin_16-03-39  | Sulfobacillus_thermosulfidooxidans | 15862 | 3845683 |
| 202 | Cj_media_MH_R1_23Feb15_Arwen_14-12-03                               | Campylobacter_jejuni               | 24941 | 3870624 |
| 203 | Cj_media_MH_R2_23Feb15_Arwen_14-12-03                               | Campylobacter_jejuni               | 24931 | 3895555 |
| 204 | Cj_media_MH_R3_23Feb15_Arwen_14-12-03                               | Campylobacter_jejuni               | 21400 | 3916955 |
| 205 | Cj_media_MH_R4_23Feb15_Arwen_14-12-03                               | Campylobacter_jejuni               | 25037 | 3941992 |

|     |                                                          |                               |       |         |
|-----|----------------------------------------------------------|-------------------------------|-------|---------|
| 206 | Cj_media_MH_R5_23Feb15_Arwen_14-12-03                    | Campylobacter_jejuni          | 20168 | 3962160 |
| 207 | LP_LS_Phi_Stat_R1_30Sep14_Pippin_13-04-12                | Legionella_pneumophila        | 26779 | 3988939 |
| 208 | LP_LS_Phi_Stat_R2_30Sep14_Pippin_13-04-12                | Legionella_pneumophila        | 27771 | 4016710 |
| 209 | LP_LS_Phi_Stat_R3_30Sep14_Pippin_13-04-12                | Legionella_pneumophila        | 25938 | 4042648 |
| 210 | P_putida_01Dec15_1_21Mar16_Arwen_16-01-03                | Pseudomonas_putida_KT2440     | 23697 | 4066345 |
| 211 | P_putida_01Dec15_2_21Mar16_Arwen_16-01-03                | Pseudomonas_putida_KT2440     | 24322 | 4090667 |
| 212 | P_putida_17Nov15_1_21Mar16_Arwen_16-01-03                | Pseudomonas_putida_KT2440     | 22904 | 4113571 |
| 213 | P_putida_17Nov15_2_21Mar16_Arwen_16-01-03                | Pseudomonas_putida_KT2440     | 22395 | 4135966 |
| 214 | P_putida_18Nov15_1_21Mar16_Arwen_16-01-03                | Pseudomonas_putida_KT2440     | 22246 | 4158212 |
| 215 | P_putida_18Nov15_2_21Mar16_Arwen_16-01-03                | Pseudomonas_putida_KT2440     | 22937 | 4181149 |
| 216 | S_venezuelae_GYM_1_21Mar16_Arwen_16-01-03                | Streptomyces_venezuelae       | 12030 | 4193179 |
| 217 | S_venezuelae_GYM_2_21Mar16_Arwen_16-01-03                | Streptomyces_venezuelae       | 11099 | 4204278 |
| 218 | S_venezuelae_MYM_1_21Mar16_Arwen_16-01-03                | Streptomyces_venezuelae       | 14276 | 4218554 |
| 219 | S_venezuelae_MYM_2_21Mar16_Arwen_16-01-03                | Streptomyces_venezuelae       | 14322 | 4232876 |
| 220 | QC_Shew_13_05_500ng_2_100uL_5hr_30Mar14_Samwise_13-07-17 | Shewanella_oneidensis_MR-1    | 49123 | 4281999 |
| 221 | QC_Shew_13_05_500ng_2_5hr_19Mar14_Samwise_13-07-17       | Shewanella_oneidensis_MR-1    | 50274 | 4332273 |
| 222 | QC_Shew_13_05_500ng_2_5hr_24Mar14_Samwise_13-07-17       | Shewanella_oneidensis_MR-1    | 50273 | 4382546 |
| 223 | M_alcali_copp_CH4_B1_T1_07_QE_23Mar18_Oak_18-01-07       | Methylomicrobium_alcaliphilum | 21112 | 4403658 |
| 224 | M_alcali_copp_CH4_B1_T2_08_QE_23Mar18_Oak_18-01-07       | Methylomicrobium_alcaliphilum | 21074 | 4424732 |
| 225 | M_alcali_copp_CH4_B2_T1_09_QE_23Mar18_Oak_18-01-07       | Methylomicrobium_alcaliphilum | 18470 | 4443202 |
| 226 | M_alcali_copp_CH4_B2_T2_10_QE_23Mar18_Oak_18-01-07       | Methylomicrobium_alcaliphilum | 18257 | 4461459 |
| 227 | M_alcali_copp_CH4_B3_T1_11_QE_23Mar18_Oak_18-01-07       | Methylomicrobium_alcaliphilum | 20464 | 4481923 |

|     |                                                         |                                      |       |         |
|-----|---------------------------------------------------------|--------------------------------------|-------|---------|
| 228 | M_alcali_copp_CH4_B3_T2_12_QE_23Mar18_Oak_18-01-07      | Methylomicrobium_alcaliphilum        | 20368 | 4502291 |
| 229 | M_alcali_copp_MeOH_B1_T1_01_QE_23Mar18_Oak_18-01-07     | Methylomicrobium_alcaliphilum        | 18067 | 4520358 |
| 230 | M_alcali_copp_MeOH_B1_T2_02_QE_23Mar18_Oak_18-01-07     | Methylomicrobium_alcaliphilum        | 18229 | 4538587 |
| 231 | M_alcali_copp_MeOH_B2_T1_03_QE_23Mar18_Oak_18-01-07     | Methylomicrobium_alcaliphilum        | 17445 | 4556032 |
| 232 | M_alcali_copp_MeOH_B2_T2_04_QE_23Mar18_Oak_18-01-07     | Methylomicrobium_alcaliphilum        | 18191 | 4574223 |
| 233 | M_alcali_copp_MeOH_B3_T1_05_QE_23Mar18_Oak_18-01-07     | Methylomicrobium_alcaliphilum        | 15781 | 4590004 |
| 234 | M_alcali_copp_MeOH_B3_T2_06_QE_23Mar18_Oak_18-01-07     | Methylomicrobium_alcaliphilum        | 14536 | 4604540 |
| 235 | Alverdy_Efae_1A_lys_13Jul13_Pippin_12-12-39             | Enterococcus_faecalis                | 16181 | 4620721 |
| 236 | Alverdy_Efae_1B_lys_13Jul13_Pippin_12-12-39             | Enterococcus_faecalis                | 16055 | 4636776 |
| 237 | Alverdy_Efae_1C_lys_13Jul13_Pippin_12-12-39             | Enterococcus_faecalis                | 15814 | 4652590 |
| 238 | Biodiversity_A_muciniphila_test_27Feb17_Pippin_16-11-03 | Akkermansia_muciniphila_ATCC_BAA-835 | 21214 | 4673804 |
| 239 | Ha_150NaCl_1_13_QE_12Aug15_Arwen_14-12-03               | Halanaerobium_congolense             | 27902 | 4701706 |
| 240 | Ha_150NaCl_2_14_QE_12Aug15_Arwen_14-12-03               | Halanaerobium_congolense             | 29961 | 4731667 |
| 241 | Ha_150NaCl_3_15_QE_12Aug15_Arwen_14-12-03               | Halanaerobium_congolense             | 27892 | 4759559 |
| 242 | Ha_200NaCl_1_22_QE_21Jan16_Arwen_15-07-13               | Halanaerobium_congolense             | 29705 | 4789264 |
| 243 | Ha_200NaCl_2_23_QE_21Jan16_Arwen_15-07-13               | Halanaerobium_congolense             | 28807 | 4818071 |
| 244 | Ha_200NaCl_3_24_QE_21Jan16_Arwen_15-07-13               | Halanaerobium_congolense             | 29544 | 4847615 |
| 245 | Ha_250NaCl_1_16_QE_12Aug15_Arwen_14-12-03               | Halanaerobium_congolense             | 15326 | 4862941 |
| 246 | Ha_250NaCl_2_17_QE_12Aug15_Arwen_14-12-03               | Halanaerobium_congolense             | 19355 | 4882296 |
| 247 | Ha_250NaCl_3_18_QE_12Aug15_Arwen_14-12-03               | Halanaerobium_congolense             | 22461 | 4904757 |
| 248 | YJ_Cc_WT1_C_P_9Jan17_Pippin_16-09-11                    | Caulobacter_crescentus_NA1000        | 22820 | 4927577 |
| 249 | YJ_Cc_WT1_IM_P_9Jan17_Pippin_16-09-11                   | Caulobacter_crescentus_NA1000        | 19081 | 4946658 |

|     |                                         |                               |       |         |
|-----|-----------------------------------------|-------------------------------|-------|---------|
| 250 | YJ_Cc_WT1_OM_P_9Jan17_Pippin_16-09-11   | Caulobacter_crescentus_NA1000 | 26060 | 4972718 |
| 251 | YJ_Cc_WT1_P_Prot_9Jan17_Pippin_16-09-11 | Caulobacter_crescentus_NA1000 | 21323 | 4994041 |
| 252 | YJ_Cc_WT1_WC_P_9Jan17_Pippin_16-09-11   | Caulobacter_crescentus_NA1000 | 17975 | 5012016 |
| 253 | YJ_Cc_WT2_C_P_9Jan17_Pippin_16-09-11    | Caulobacter_crescentus_NA1000 | 22620 | 5034636 |
| 254 | YJ_Cc_WT2_IM_P_9Jan17_Pippin_16-09-11   | Caulobacter_crescentus_NA1000 | 19881 | 5054517 |
| 255 | YJ_Cc_WT2_OM_P_9Jan17_Pippin_16-09-11   | Caulobacter_crescentus_NA1000 | 20632 | 5075149 |
| 256 | YJ_Cc_WT2_P_Prot_9Jan17_Pippin_16-09-11 | Caulobacter_crescentus_NA1000 | 24577 | 5099726 |
| 257 | YJ_Cc_WT2_WC_P_9Jan17_Pippin_16-09-11   | Caulobacter_crescentus_NA1000 | 16579 | 5116305 |

**Table S2.** For each of the six natural isolates, replicate proteomics data was annotated with Kaiko and high-rank taxa were identified from the sequence alignment of identified peptides against the UniRef database. Each sheet in the Supplementary file has the number of hits for each taxon id for 6 natural isolates (2~3 reps for each). It will be attached as an Excel file.

**Table S3.** Top 20 of EC numbers most frequently matched from the unique peptides using Unipept 4.6.3 with the identified peptide sequences.

| EC number   | Name                                                                       | PepCounts |
|-------------|----------------------------------------------------------------------------|-----------|
| EC:7.1.2.2  | H(+)-transporting two-sector ATPase                                        | 563       |
| EC:2.7.7.6  | DNA-directed RNA polymerase                                                | 498       |
| EC:3.6.5.3  | Protein-synthesizing GTPase                                                | 198       |
| EC:6.3.1.2  | Glutamine synthetase                                                       | 149       |
| EC:1.2.1.-  | With NAD(+) or NADP(+) as acceptor                                         | 144       |
| EC:1.1.2.-  | With a cytochrome as acceptor                                              | 110       |
| EC:3.6.3.-  | Acting on acid anhydrides; catalyzing transmembrane movement of substances | 107       |
| EC:3.6.3.14 | Transferred entry: 7.1.2.2                                                 | 105       |

|              |                                                              |     |
|--------------|--------------------------------------------------------------|-----|
| EC:2.7.7.8   | Polyribonucleotide nucleotidyltransferase                    | 101 |
| EC:3.6.4.-   | Acting on ATP; involved in cellular and subcellular movement | 96  |
| EC:1.11.1.21 | Catalase peroxidase                                          | 90  |
| EC:1.1.1.37  | Malate dehydrogenase                                         | 89  |
| EC:5.2.1.8   | Peptidylprolyl isomerase                                     | 84  |
| EC:4.2.1.11  | Phosphopyruvate hydratase                                    | 82  |
| EC:4.2.1.3   | Aconitate hydratase                                          | 82  |
| EC:1.1.1.100 | 3-oxoacyl-[acyl-carrier-protein] reductase                   | 80  |
| EC:2.7.13.3  | Histidine kinase                                             | 80  |
| EC:1.15.1.1  | Superoxide dismutase                                         | 71  |
| EC:1.-.-     | Oxidoreductases                                              | 70  |
| EC:1.1.1.-   | With NAD(+) or NADP(+) as acceptor                           | 67  |
